# Supplementary material
Source: Springer Nature journal article supplement (https://www.springermedizin.de/resource/supplementary/12990_2009_224_MOESM6_ESM.pdf/9612826)

B1

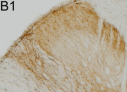

B4

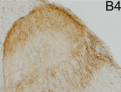

B2

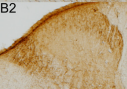

B5

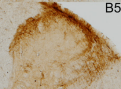

B3

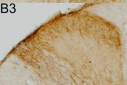

B6

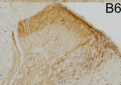

Supplement: MOESM6 [file 9612826]
